# Supplementary material for: Uremia causes dysbiosis-mediated periodontal disease
Source: Research Square preprint supplement (doi:10.21203/rs.3.rs-143371/v1), 2021-01-25
Supplement: Supplementary file 1 [file 27222c16bc189186951f3064.xlsx]

## Sheet: Sheet1
Rat	Treatment	8 minute salivary volume (ml)	pH	Salivary urea	Serum urea
1	Uraemic	89	8.1	2.24758	6.11388
2	Uraemic	71	8.06	5.83982	17.0446
3	Uraemic	59	7.72	4.01098	10.5611
4	Uraemic	35	8.58	4.99617	7.43922
5	Uraemic		8.34	3.995	7.57742
12	Uraemic	64	8.27	2.59624	8.77289
13	Uraemic	38	8.28	2.39011	7.65733
6	Control	42	7.89	1.54212	3.64635
7	Control	97	8.09	1.47136	3.34165
8	Control	23	8.5	1.52298	3.17349
9	Control	26	8.27	1.75707	4.71361
10	Control	57	8.3	1.80669	3.49484
11	Control	40	8.33	1.63403	4.54711
	Ur mean	59.3333	8.19286	3.72513	9.30949
	Ct mean	47.5	8.23	1.62238	3.81951
	p	0.415177	0.786144	0.00680935	0.00712895
