# Supplementary material for: Uremia causes dysbiosis-mediated periodontal disease
Source: Research Square preprint supplement (doi:10.21203/rs.3.rs-143371/v1), 2021-01-25
Supplement: Supplementary file 2 [file 5437def572d7ae3fdf24e4a3.xlsx]

## Sheet: Sheet1
Cage	Mouse	Treatment	Diet	Weight	Weight	Weight	Weight	Weight	Weight	Weight	Mouse	Weight	Weight	Urine volume (ml)	Weight	Weight	Weight	Weight	Weight	Weight	Urine volume (ml)	Periodontal bone loss
				Arrival	w2	w4	w5	w6	w7	w9		w10	w11	w11	w12	w12	w14	w16	w17	w18	w18
				2018-02-20	2018-03-16	2018-03-27	2018-04-03	2018-04-10	2018-04-17	2018-05-01		2018-05-10	2018-05-15		2018-05-21	2018-05-25	2018-06-04	2018-06-11	2018-06-20	2018-06-29
1	1	Uremic	RM1 + 0.15% adenine	24.2	25.7	26.6	27	27.1	27.5	25.4	1	25.5	25.9	3.2	25.1	24.5	25.3	23.8	24.5	23.2	6.8	-0.01997
	2	Uremic	RM1 + 0.15% adenine	26.4	26.9	27.3	27.7	27.2	27.3	25.6	2	25.5	25.8	3.5	25.6	27	27	26.2	26.5	24.2	4.3	-0.01565
	3	Uremic	RM1 + 0.15% adenine	28.3	29.2	30.8	30.1	31.2	31.5	31.1	3	29.6	28.6	7.5	29.1	29.5	29.2	27.9	27.9	27.7	11.5	-0.03222
	4	Uremic	RM1 + 0.15% adenine	22.7	23	24	24.1	23.8	24.3	22.6	4	20.6	20.6	5.5	20.8	21.7	22.1	21.1	21.4	20.9	6.3	-0.01798
	5	Uremic	RM1 + 0.15% adenine	22	23.4	24.7	25.1	24.4	24.4	24.1	5	23.4	23.7	9	25.6	23.9	24.7	23.4	24.1	22.8	7	-0.012
2	6	Uremic	RM1 + 0.15% adenine	22.3	23.8	24.4	25.1	25.1	25.3	25.6	6	25	24.9	5.9	24	25.1	25.3	24.3	24.5	23.9	8	-0.01321
	7	Uremic	RM1 + 0.15% adenine	22.5	26.2	27.1	27.3	25.7	27.2	28.6	7	27.7	27.7	6	27.5	27.9	27.3	26.3	27.2	26.7	8.9	-0.01134
	8	Uremic	RM1 + 0.15% adenine	26.5	27.4	28	28.3	28	28	27.7	8	25.8	26.3	8	25.8	27.2	27.4	27.3	26.8	26.6	7.2	-0.01395
	9	Uremic	RM1 + 0.15% adenine	25	26	25.8	26	25.6	25.4	25.3	9	24.9	24.8	5.2	24.9	25.7	25.8	25	25.1	23.7	7	-0.02677
	10	Uremic	RM1 + 0.15% adenine	25.2	26.7	26.7	26.2	26.9	27.1	26.5	10	25.1	24.8	7.7	25	25.1	25	25	23.9	24.4	10.2	-0.00407
																						0.64393
3	11	Control	RM1	21.8	23.9	25.2	25.8	26.1	26.8	27.1	11	27.5	27.4	0.5	28.1	28.4	28.4	28	29.2	29.7	1.5	0.011774
	12	Control	RM2	22.5	25.6	27.4	27.7	27.8	28.4	28.9	12	29.5	29.7	0	29.4	29.6	30.6	27.3	30.8	30.7	0	0.007064
	13	Control	RM3	24	25.6	27.8	27.5	27.8	28.2	29.2	13	30.2	30.7	1.5	30.6	31.1	31.5	30.6	31.4	31.5	2.1	-0.01146
	14	Control	RM4	22.4	24.6	25.7	27.2	27	27.2	28.1	14	28.8	28.6	0.3	29.2	29.5	30.9	30	30.3	30.4	0	0.003214
	15	Control	RM5	23.6	25.6	26.7	26	26.7	27	28.7	15	29.5	29.4	0.1	29.3	29.1	29.8	29.4	29.6	29.8	1.1	0.013359
4	16	Control	RM6	23.5	26.2	28.7	29.9	30	30.8	31.8	16	32.5	32.8	1.2	31.9	32.6	34.3	33.4	34.5	33.4	2.1	-0.00494
	17	Control	RM7	22.5	24.1	24.8	25.4	25.5	26.3	26.3	17	26.4	27	0.3	27.5	27.9	28.5	27.9	29.1	28.9	1.9	-0.00035
	18	Control	RM8	21.1	25.3	28.3	28.7	28.5	29.5	31.2	18	31.2	31.8	1.1	30.5	31.6	33.2	32.6	33.7	32	1.5	0.003758
	19	Control	RM9	22.6	24.1	25.8	26.5	26.4	26.4	27.6	19	27.7	28.3	1.5	28.8	28.6	29.3	29.4	30.2	30.2	2	-0.00938
	20	Control	RM10	25.3	27.9	29.6	31	31.4	32.1	32.4	20	32	32.5	0	32.8	33.5	33.7	33.6	34.7	34.3	0	-0.01304
																						0.532454
			Uremic mean	24.51	25.83	26.54	26.69	26.5	26.8	26.25		25.31	25.31	6.15	25.34	25.76	25.91	25.03	25.19	24.41	7.72	-0.016716
			Control mean	22.93	25.29	27	27.57	27.72	28.27	29.13		29.53	29.82	0.65	29.81	30.19	31.02	30.22	31.35	31.09	1.22	-1e-07
			p	0.0607876	0.466924	0.579196	0.288541	0.185833	0.126337	0.00996596		0.000452921	0.000171939	3.40064e-06	7.39251e-05	0.00015791	2.57955e-05	4.45597e-05	2.93443e-06	3.70229e-07	7.16837e-07	0.00050392
