# Supplementary material for: Uremia causes dysbiosis-mediated periodontal disease
Source: Research Square preprint supplement (doi:10.21203/rs.3.rs-143371/v1), 2021-01-25
Supplement: Supplementary file 3 [file 6f661b66bd7d3bd51fe06685.xlsx]

## Sheet: m_MTBLS1010_NMR___metabolite_pr
Animal	Treatment	Acetate	Lactate	3-Hydroxyisovalerate	Acetoin	Succinate	Dimethyl sulphone	Glycerol	Formate
1	Uremic	92.7591	43.5796	31.7378	13.3861	11.7383	9.19766	67.3492	4.23016
2	Uremic	75.8149	48.0074	37.1855	13.4797	8.76632	13.4378	158.374	2.03842
3	Uremic	78.3604	38.7241	32.1441	11.9012	7.09711	8.29799	824.18	1.28934
4	Uremic	86.0118	55.7325	20.8938	7.56966	12.3269	5.46744	540.397	1.56307
5	Uremic	120.437	28.7756	24.5643	11.7729	8.72174	11.8991	628.329	2.52598
12	Uremic	70.3047	37.4979	29.6192	12.6276	8.41981	7.8513	117.988	0.63884
13	Uremic	100.068	177.165	34.6069	14.4181	9.69939	11.4507	140.134	0.334284
6	Control	123.326	105.029	46.3714	15.0122	8.24894	6.29106	536.38	1.65981
7	Control	99.4152	179.315	46.4752	16.6821	13.9344	8.35854	53.3119	2.93752
8	Control	152.773	105.751	19.7419	8.82267	8.97387	3.01561	536.897	1.66294
9	Control	136.658	51.8784	29.1688	10.7829	7.48748	6.30326	102.333	1.78566
10	Control	96.5008	135.296	23.6527	9.70414	6.66469	2.19362	443.881	1.22179
11	Control	124.474	123.582	22.6501	10.1792	9.9336	4.56168	77.0677	1.2956
	Uremic mean	89.1079	61.3546	30.1074	12.165	9.5385	9.65743	353.822	1.80287
	Control mean	122.191	116.809	31.3433	11.8638	9.20716	5.12063	291.645	1.76055
	p	0.0134945	0.0562306	0.824833	0.850656	0.799956	0.00794362	0.686922	0.941025
