# Supplementary material for: Uremia causes dysbiosis-mediated periodontal disease
Source: Research Square preprint supplement (doi:10.21203/rs.3.rs-143371/v1), 2021-01-25
Supplement: Supplementary file 6 [file 909373cc1d632d46ac223bcd.xlsx]

## Sheet: Sheet1
Animal number	Experiment	Diet	Surgery	Treatment	Batch	Housing	Weight at time of cull	24h urine output at time of cull	Serum urea	Serum creatinine	Serum calcium	Serum phosphate	Serum PTH	Mean periodontal bone loss
A1	Chemically induced uremia	RM1 + 0.75% adenine	None	Uremic	1	1	401	60	55.4	324			10.238	-0.08221
A2	Chemically induced uremia	RM1 + 0.75% adenine	None	Uremic	1	1	413	85	68.2	360			6.716	-0.09504
A3	Chemically induced uremia	RM1 + 0.75% adenine	None	Uremic	1	1	396	63	39.9	245			35.35	-0.11127
A4	Chemically induced uremia	RM1 + 0.75% adenine	None	Uremic	2	2	376	70	18.1	79			6.45	-0.17684
A5	Chemically induced uremia	RM1 + 0.75% adenine	None	Uremic	2	2	372	38	15.9	85			12.164	-0.15502
A6	Chemically induced uremia	RM1 + 0.75% adenine	None	Uremic	2	2	385	56	19.6	106			13.378	-0.08441
A7	Chemically induced uremia	RM1 + 0.75% adenine	None	Uremic	2	3	365	50	20.6	98			14.382	-0.03967
A8	Chemically induced uremia	RM1 + 0.75% adenine	None	Uremic	2	3	401	31	24.5	120			5.23	-0.06467
A9	Chemically induced uremia	RM1 + 0.75% adenine	None	Uremic	2	3			16.4	91			7.428	-0.02476
A10	Chemically induced uremia	RM1	None	Control	1	4	420	15	7.9	44			26.38	-0.0025
A11	Chemically induced uremia	RM2	None	Control	1	4	474	26	5.5	40			10.596	-0.05962
A12	Chemically induced uremia	RM3	None	Control	1	4	631	29	4.8	46			8.448	-0.00041
A13	Chemically induced uremia	RM4	None	Control	2	5	425	17	6	41			14.778	0.009783
A14	Chemically induced uremia	RM5	None	Control	2	5	539	25	4.6	37			15.264	-0.01401
A15	Chemically induced uremia	RM6	None	Control	2	5	502	16	4.5	38			24.236	0.013182
A16	Chemically induced uremia	RM7	None	Control	2	6	486	16	6.6	36			25.772	-0.00842
A17	Chemically induced uremia	RM8	None	Control	2	6	540	15	6	43			15.982	0.066801
A18	Chemically induced uremia	RM9	None	Control	2	6	540	29	5.9	35			11.052	-0.0048
S1	Surgically induced uremia	RM10	Subtotal nephrectomy	Uremic	3	7	531	45	16.7	110	2.6	2.4		-0.11947
S2	Surgically induced uremia	RM11	Subtotal nephrectomy	Uremic	3	7	477	41	12.3	64	2.6	2.2		-0.147321
S3	Surgically induced uremia	RM12	Subtotal nephrectomy	Uremic	3	7	463	45	18.2	84	2.5	2.3		-0.15697
S4	Surgically induced uremia	RM13	Subtotal nephrectomy	Uremic	3	7	436	33	13.2	68	2.6	2.2		-0.214317
S5	Surgically induced uremia	RM14	Subtotal nephrectomy	Uremic	3	8	456	44	19.1	84	2.7	2		-0.12879
S6	Surgically induced uremia	RM15	Subtotal nephrectomy	Uremic	3	8	455	76	12.1	69	2.6	2.3		-0.126159
S7	Surgically induced uremia	RM16	Subtotal nephrectomy	Uremic	3	9	451	71	13.4	63	2.6	2		-0.108944
S8	Surgically induced uremia	RM17	Subtotal nephrectomy	Uremic	3	9	479	40	10.6	52	2.7	2.3		-0.109273
S15	Surgically induced uremia	RM24	Subtotal nephrectomy	Uremic	4	11	474	23	11.8	61	2.6	2.1		-0.121773
S16	Surgically induced uremia	RM25	Subtotal nephrectomy	Uremic	4	11	505	29	12.6	80	2.6	2.1		-0.1361
S17	Surgically induced uremia	RM26	Subtotal nephrectomy	Uremic	4	12	476	56	13.3	68	2.5	2.5		-0.0816411
S18	Surgically induced uremia	RM27	Subtotal nephrectomy	Uremic	4	12	485	39	11.8	62	2.7	2.3		-0.119141
S19	Surgically induced uremia	RM28	Subtotal nephrectomy	Uremic	4	13	506		11.3	58	2.6	2.2		-0.0900841
S20	Surgically induced uremia	RM29	Subtotal nephrectomy	Uremic	4	13	460	40	15.7	94	2.7	2.2
S9	Surgically induced uremia	RM18	Sham procedure	Control	3	8	460	29	5.6	28	2.6	1.9		0.0395212
S10	Surgically induced uremia	RM19	Sham procedure	Control	3	8	530	43	5.5	28	2.6	2.1		-0.0195797
S11	Surgically induced uremia	RM20	Sham procedure	Control	3	9	508	9	5.9	27	2.5	1.9		0.0213194
S12	Surgically induced uremia	RM21	Sham procedure	Control	3	10	523	33	6.8	28	2.5	1.9		0.0567361
S13	Surgically induced uremia	RM22	Sham procedure	Control	3	10	573	12	6.1	23	2.5	1.7		-0.0489656
S14	Surgically induced uremia	RM23	Sham procedure	Control	3	10	470	17	6.8	29	2.6	2.3		-0.0044481
S21	Surgically induced uremia	RM30	Sham procedure	Control	4	12	585	14	6.5	33	2.5	2.2		0.0549817
S22	Surgically induced uremia	RM31	Sham procedure	Control	4	13	448	23	5.6	21	2.5	2.2		-0.00543494
S23	Surgically induced uremia	RM32	Sham procedure	Control	4	14	488	49	5.3	28	2.6	2.1		-0.0252814
S24	Surgically induced uremia	RM33	Sham procedure	Control	4	14	526	17	6.3	32	2.5	2		-0.0688487
