# Supplementary material for: Uremia causes dysbiosis-mediated periodontal disease
Source: Research Square preprint supplement (doi:10.21203/rs.3.rs-143371/v1), 2021-01-25
Supplement: Supplementary file 7 [file f193cba07da456c1790ec995.xlsx]

## Sheet: Sheet1
Mouse	Shipment	Cage	Donor mouse	Treatment	Periodontal bone loss
1	1	1	11	Control recipient	0.009821
2	1			Control recipient	-0.0051
3	1		12	Control recipient	-0.00345
4	1	2	13	Control recipient	0.005246
5	1			Control recipient	-0.01101
6	1		14	Control recipient	0.006469
7	1			Control recipient	-0.00069
8	2	3	1	Uremic recipient	-0.05503
9	2			Uremic recipient	-0.03443
10	2		2	Uremic recipient	-0.04711
11	2			Uremic recipient	-0.03383
12	3	4	3	Uremic recipient	-0.02578
13	3			Uremic recipient	-0.05436
14	3		4	Uremic recipient	-0.04004
15	3			Uremic recipient	-0.04887
				Control recipients	0.000183714
				Uremic recipients	-0.0424313
				p	7.16882e-07
